# Supplementary material for: Reconstructing ocean carbon storage with CMIP6 Earth system models and synthetic Argo observations
Source: Copernicus journal article supplement (doi:10.5194/bg-20-1671-2023), 2023-04-28
Supplement: Supplementary file 1 [file bg-20-1671-2023-supplement.pdf]

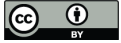

*Supplement of*

## **Reconstructing ocean carbon storage with CMIP6 Earth system models and synthetic Argo observations**

**Katherine E. Turner et al.**

*Correspondence to:* Katherine E. Turner (k.e.turner2@liverpool.ac.uk)

The copyright of individual parts of the supplement might differ from the article licence.

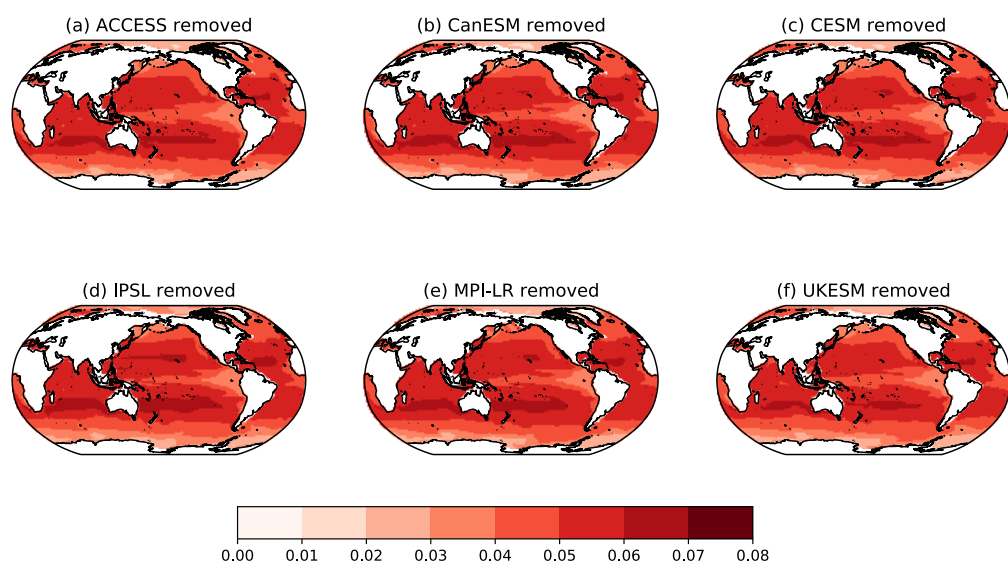

Figure S1: Optimal pCO<sub>2</sub> weights, in units mol C (ppm CO<sub>2</sub> m<sup>2</sup>)<sup>-1</sup>, for solving integrated ocean DIC' between 0-100m using a subset of CMIP6 models. The subsets are created by removing the runs of each model: (a) ACCESS, (b) CanESM, (c) CESM, (d) IPSL, (e) MPI-LR, and (f) UKESM.

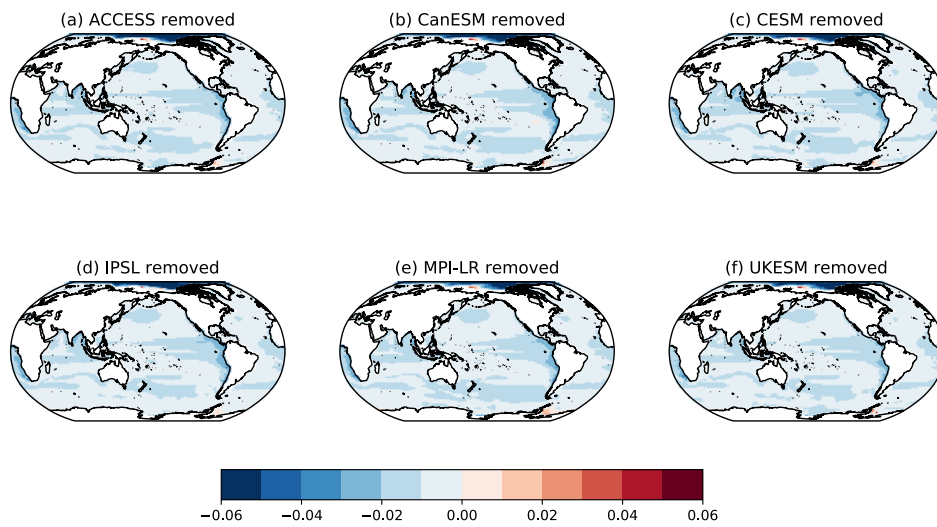

Figure S2: Optimal  $T'$  weights, in units  $\text{mol C } (^\circ\text{C m}^2)^{-1}$ , for solving integrated ocean  $DIC'$  between 0-100m using a subset of CMIP6 models. The subsets are created by removing the runs of each model: (a) ACCESS, (b) CanESM, (c) CESM, (d) IPSL, (e) MPI-LR, and (f) UKESM.

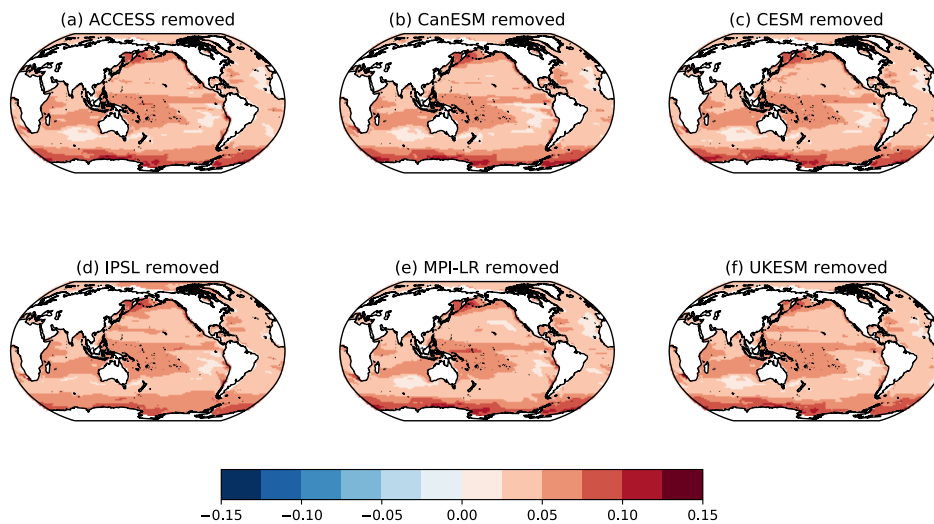

Figure S3: Optimal  $S'$  weights, in units  $\text{mol C (psu m}^2\text{)}^{-1}$ , for solving integrated ocean  $DIC'$  between 0-100m using a subset of CMIP6 models. The subsets are created by removing the runs of each model: (a) ACCESS, (b) CanESM, (c) CESM, (d) IPSL, (e) MPI-LR, and (f) UKESM.

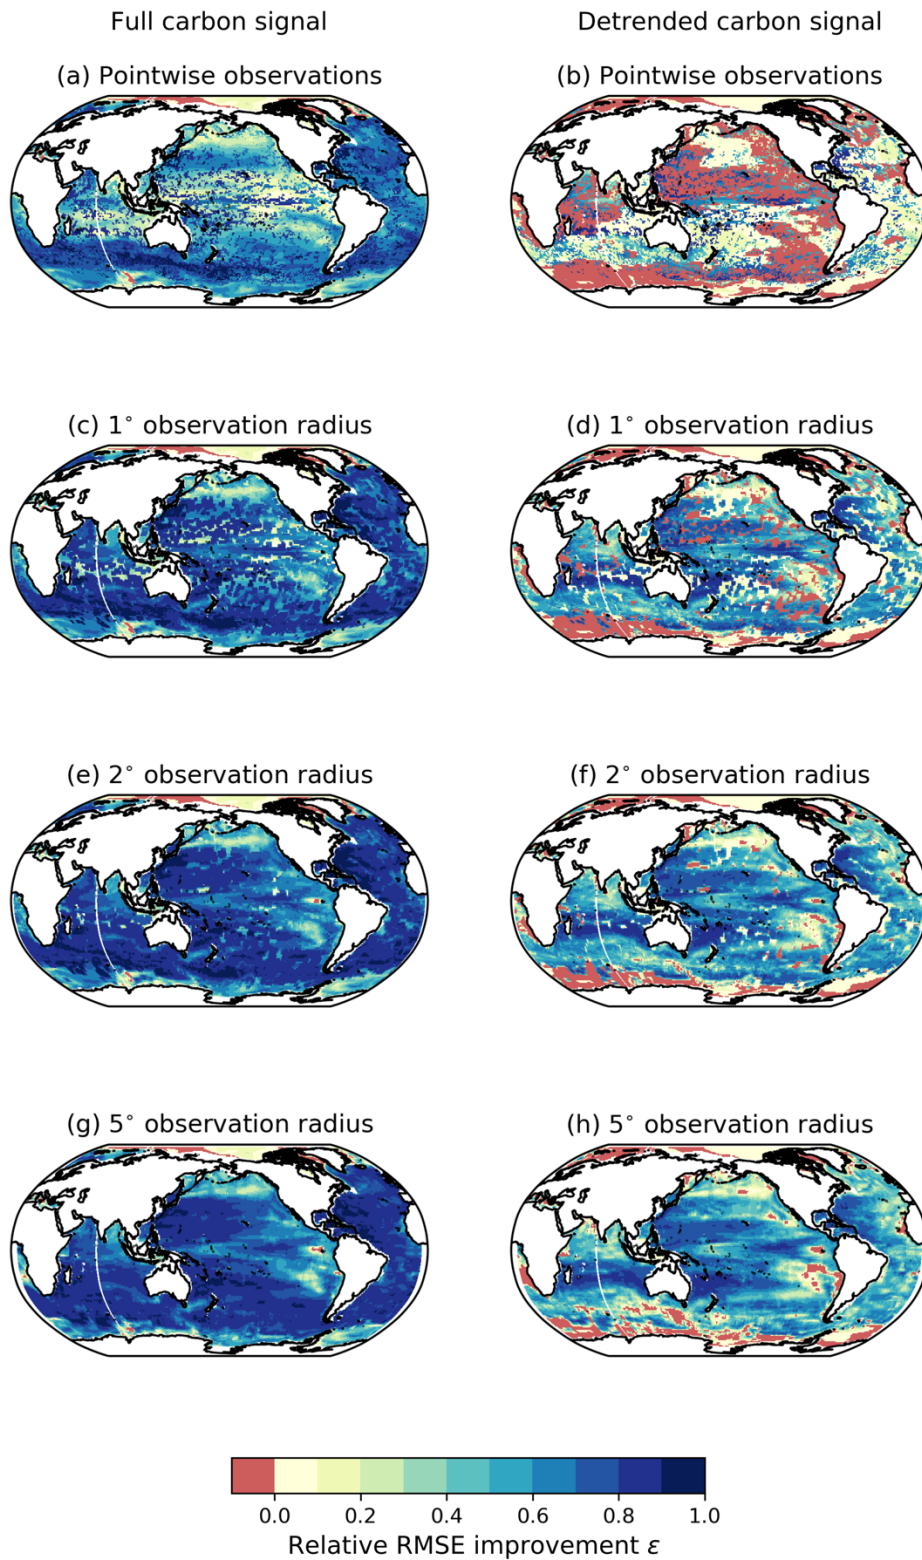

Figure S4: Relative RMSE reduction for NorESM 0-100m carbon changes (left column) and detrended 0-100m carbon changes (right column) using year 2015 Argo profile locations and different cutoff radii: (a,b) using only co-located temperature and salinity profiles, (c,d) using a cutoff radius of 1°, (e,f) using a cutoff radius of 2°, and (g,h) using a cutoff radius of 5°.

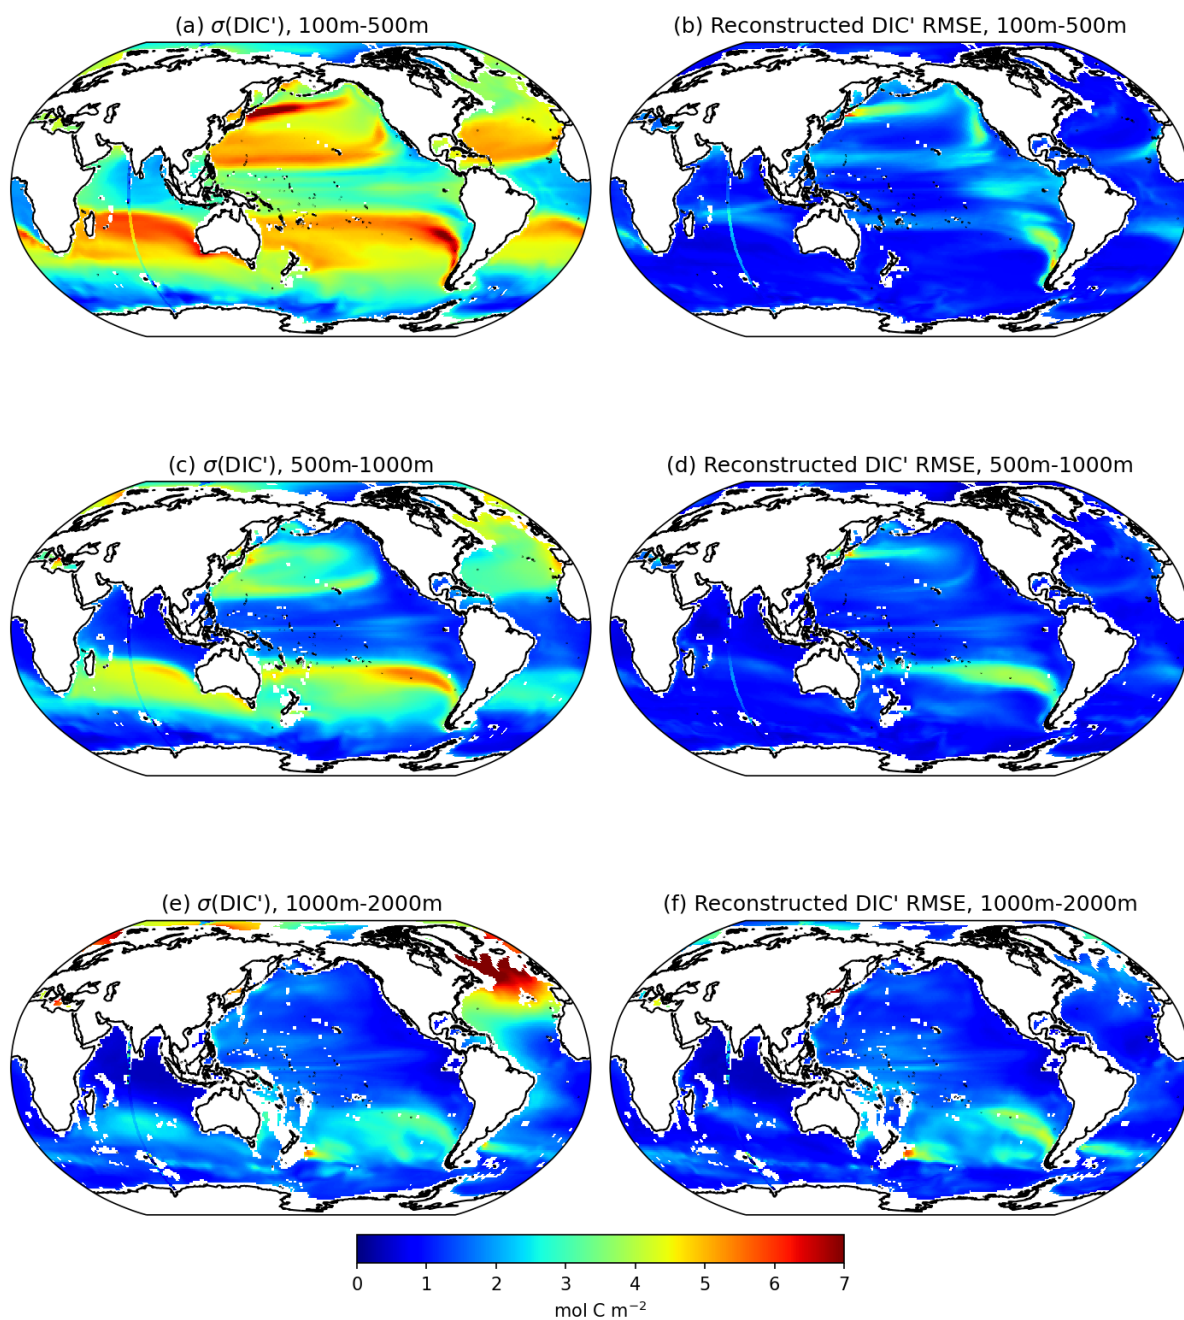

Figure S5: Average standard deviation in integrated interior DIC (left column) and RMSE for interior reconstructed DIC (right column) across the sensitivity ensemble. Standard deviations and RMSE are in units  $\text{mol C m}^{-2}$ . Depth levels are as follows: (a,b) 100m-500m, (c,d) 500m-1000m, and (e,f) 1000m-2000m.
